# Supplementary material for: Weighted gene correlation network analysis identifies microenvironment-related genes signature as prognostic candidate for Grade II/III glioma
Source: Aging (Albany NY). 2020 Nov 7;12(21):22122–38. doi: 10.18632/aging.104075 (PMC7695422; doi:10.18632/aging.104075)
Supplement: Supplementary Table 1 [file aging-12-104075-s001..xlsx]

## Sheet: Sheet1
Supplementary Table 1. Clinical data.
id	gneder	age	survival_status	survival_time/month	site	histology	grade	ΔCT(AIF1)	AIF1/GAPDH	ΔCT(C1QC)	C1QC/GAPDH	ΔCT(CD37)	CD37/GAPDH	ΔCT(FCER1G)	FCER1G/GAPDH	ΔCT(GAPDH)	GAPDH/GAPDH	ΔCT(HAVCR2)	HAVCR2/GAPDH	ΔCT(HCK)	HCK/GAPDH	ΔCT(LPPR5)	LPPR5/GAPDH	ΔCT(NAGA)	NAGA/GAPDH	risk_score
1376807	male	34	alive	53	Temporal parietal lobe	astrocytoma	2	8.601	0.00257539	6.03028	0.0153004	9.01102	0.00193826	6.37222	0.0120718	0	1	10.7072	0.000598146	10.717	0.000594113	10.8395	0.000545724	10.5077	0.000686859	0.000355335
1526810	female	45	alive	41	parietal lobe	astrocytoma	3	4.87773	0.0340139	3.40236	0.0945772	7.36682	0.00605853	3.72075	0.075848	0	1	7.33643	0.0061875	8.26419	0.00325261	12.8519	0.000135263	7.75563	0.00462726	0.00194304
1565440	male	42	alive	40	Frontal parietal lobe	astrocytoma	3	5.45434	0.0228077	3.44079	0.0920913	7.60167	0.00514836	4.26418	0.0520419	0	1	7.94239	0.00406538	7.37869	0.00600887	12.0546	0.000235066	7.87972	0.00424588	0.00120755
1456816	male	6	alive	48	Vermis of cerebellum	astrocytoma	2	4.65172	0.0397825	3.5521	0.0852534	7.61245	0.00511006	3.91819	0.0661464	0	1	7.6943	0.00482821	7.69503	0.00482576	11.4386	0.000360277	8.39868	0.0029631	0.000682598
1553060	male	30	alive	39	thalamus	Oligodendroglioma	2	4.51576	0.043714	3.54002	0.0859699	6.89436	0.00840601	4.7714	0.0366154	0	1	8.09037	0.00366907	8.28918	0.00319675	8.79891	0.00224525	7.87337	0.00426461	0.000219145
1450626	male	57	dead	4	parietal lobe	astrocytoma	3	4.40403	0.0472339	2.44329	0.183864	6.20517	0.0135537	3.98151	0.063306	0	1	7.06292	0.00747911	6.7338	0.00939558	11.6175	0.00031826	6.74554	0.00931948	0.00205415
1640985	male	50	dead	2	basal ganglia	astrocytoma	3	6.29672	0.0127203	4.82497	0.0352808	7.74622	0.00465751	5.38261	0.0239702	0	1	8.44167	0.00287611	8.81411	0.00222171	11.5424	0.000335276	7.39973	0.00592187	0.00192004
1490231	male	34	dead	8	Frontal parietal lobe	astrocytoma	2	3.8297	0.0703309	2.49585	0.177286	4.87209	0.0341472	3.64729	0.0798098	0	1	6.12707	0.0143076	6.70044	0.00961538	8.57386	0.00262429	6.1865	0.0137303	0.00449355
1738540	female	57	dead	6	Bilateral frontal lobes	Oligodendroglioma	2	3.65639	0.0793078	1.32904	0.398032	5.28385	0.0256686	2.14176	0.226602	0	1	6.32485	0.0124747	6.01522	0.0154611	10.1438	0.000883917	5.93942	0.016295	0.00611645
1516282	male	25	dead	16	frontotemporal	Oligodendroglioma	2	5.83461	0.017523	3.86353	0.0687008	6.8759	0.00851428	5.33272	0.0248138	0	1	7.86459	0.00429066	8.49172	0.00277803	9.08323	0.00184364	7.7123	0.00476833	0.0013873
